# Supplementary material for: Fine-scale succession patterns and assembly mechanisms of bacterial community of Litopenaeus vannamei larvae across the developmental cycle
Source: PubMed Central journal article supplement (PMC7334860; doi:10.1186/s40168-020-00879-w), 2020-07-03
Supplement: 40168_2020_879_MOESM1_ESM.pdf [file 40168_2020_879_MOESM1_ESM.pdf]

**Additional file 1**

**Fine-scale succession patterns and assembly mechanisms of bacterial community of  
*Litopenaeus vannamei* larvae across the developmental cycle**

Yanting Wang<sup>1,2#</sup>, Kai Wang<sup>1,2##</sup>, Lei Huang<sup>1,2</sup>, Pengsheng Dong<sup>1,2</sup>, Sipeng Wang<sup>2</sup>, Heping  
Chen<sup>2,3</sup>, Zheng Lu<sup>4</sup>, Dandi Hou<sup>1,2</sup>, Demin Zhang<sup>1,2\*</sup>

#These authors contributed equally to this work.

\*Correspondence: wangkai@nbu.edu.cn (K.W.), zhangdemin@nbu.edu.cn (D.Z.)

## Supplementary Tables

**Table S1** Pairwise similarity test of bacterial communities between larval shrimp developmental stages. One-way Analysis of Similarity (ANOSIM) based on Bray-Curtis dissimilarity and weighted UniFrac distance for pairwise comparison on bacterial community composition of shrimp larvae or rearing water between host developmental stages (Data present R values with \*\*  $P < 0.01$ , \*\*\*  $P < 0.001$ ).

|               |                 | Bray-Curtis dissimilarity |                |                 |              |                   |
|---------------|-----------------|---------------------------|----------------|-----------------|--------------|-------------------|
|               | Stage           | <i>Zoea</i> I             | <i>Zoea</i> II | <i>Zoea</i> III | <i>Mysis</i> | <i>Postlarvae</i> |
| <b>Larvae</b> | <i>Nauplius</i> | 0.684***                  | 0.845***       | 0.939***        | 0.939***     | 0.662***          |
|               | <i>Zoea</i> I   |                           | 0.449***       | 0.996***        | 1.000***     | 0.997***          |
|               | <i>Zoea</i> II  |                           |                | 0.825***        | 0.993***     | 0.993***          |
|               | <i>Zoea</i> III |                           |                |                 | 0.844***     | 0.986***          |
|               | <i>Mysis</i>    |                           |                |                 |              | 0.649***          |
| <b>Water</b>  | <i>Nauplius</i> | 0.768***                  | 0.993***       | 0.973***        | 1.000***     | 1.000***          |
|               | <i>Zoea</i> I   |                           | 0.289***       | 0.676***        | 0.997***     | 1.000***          |
|               | <i>Zoea</i> II  |                           |                | 0.538***        | 1.000***     | 1.000***          |
|               | <i>Zoea</i> III |                           |                |                 | 0.548***     | 0.955***          |
|               | <i>Mysis</i>    |                           |                |                 |              | 0.931**           |
|               |                 | weighted UniFrac distance |                |                 |              |                   |
|               | Stage           | <i>Zoea</i> I             | <i>Zoea</i> II | <i>Zoea</i> III | <i>Mysis</i> | <i>Postlarvae</i> |
| <b>Larvae</b> | <i>Nauplius</i> | 0.493***                  | 0.729***       | 0.768***        | 0.536***     | 0.342***          |
|               | <i>Zoea</i> I   |                           | 0.196***       | 0.344***        | 0.389***     | 0.592***          |
|               | <i>Zoea</i> II  |                           |                | 0.319***        | 0.521***     | 0.763***          |
|               | <i>Zoea</i> III |                           |                |                 | 0.516***     | 0.802***          |
|               | <i>Mysis</i>    |                           |                |                 |              | 0.382***          |
| <b>Water</b>  | <i>Nauplius</i> | 0.822***                  | 0.994***       | 0.784***        | 0.998***     | 1.000***          |
|               | <i>Zoea</i> I   |                           | 0.147***       | 0.629***        | 0.910***     | 0.934***          |
|               | <i>Zoea</i> II  |                           |                | 0.704***        | 1.000***     | 1.000***          |
|               | <i>Zoea</i> III |                           |                |                 | 0.520***     | 0.780***          |
|               | <i>Mysis</i>    |                           |                |                 |              | 0.470**           |

**Table S2** Analysis of Similarity (ANOSIM) testing the differences between larval shrimp and rearing water bacterial communities.

|                   | Bray-Curtis dissimilarity |          | weighted UniFrac distance |          |
|-------------------|---------------------------|----------|---------------------------|----------|
|                   | R                         | <i>P</i> | R                         | <i>P</i> |
| <i>Nauplius</i>   | 0.713                     | 0.001    | 0.619                     | 0.001    |
| <i>Zoea I</i>     | 0.753                     | 0.001    | 0.615                     | 0.001    |
| <i>Zoea II</i>    | 0.933                     | 0.001    | 0.803                     | 0.001    |
| <i>Zoea III</i>   | 0.935                     | 0.001    | 0.579                     | 0.001    |
| <i>Mysis</i>      | 1.000                     | 0.002    | 0.993                     | 0.001    |
| <i>Postlarvae</i> | 0.967                     | 0.001    | 0.834                     | 0.001    |
